# Supplementary material
Source: HighWire-hosted journal article supplement (https://www.cmajopen.ca/highwire/filestream/81356/field_highwire_adjunct_files/5/reviewer-comments-2019-0060.pdf)
Supplement: reviewer-comments-2019-0060.pdf [file reviewer-comments-2019-0060.pdf]

| <b>Article details: 2019-0060</b>             |                                                                                                                                           |
|-----------------------------------------------|-------------------------------------------------------------------------------------------------------------------------------------------|
| Title                                         | Partnering For Pain: a priority setting partnership to identify patient-oriented research priorities for pediatric chronic pain in Canada |
| Authors                                       |                                                                                                                                           |
| <b>Reviewer 1</b>                             |                                                                                                                                           |
| Institution                                   |                                                                                                                                           |
| General comments<br>(author response in bold) |                                                                                                                                           |
| <b>Reviewer 2</b>                             |                                                                                                                                           |
| Institution                                   |                                                                                                                                           |
| General comments<br>(author response in bold) |                                                                                                                                           |
